# Supplementary material for: Facile Synthesis of Highly Emissive All-Inorganic Manganese Bromide Compounds with Perovskite-Related Structures for White LEDs
Source: MDPI journal article supplement (doi:10.3390/molecules27238259), 2022-11-26
Supplement: s1 [file s1]

# Supporting Information

## Facile Synthesis of Highly Emissive All-Inorganic Manganese Bromide Compounds with Perovskite-Related Structures for White LEDs

Ping Gao <sup>1</sup>, Suwen Cheng <sup>1</sup>, Jiaxin Liu <sup>1</sup>, Junjie Li <sup>1</sup>, Yanyan Guo <sup>2</sup> and Zhengtao Deng <sup>2</sup>, Tianshi Qin <sup>1</sup> and Aifei Wang <sup>1,\*</sup>

<sup>1</sup> Key Laboratory of Flexible Electronics (KLOFE) & Institute of Advanced Materials (IAM), Jiangsu National Synergetic Innovation Center for Advanced Materials (SICAM), Nanjing Tech University (Nanjing Tech), Nanjing 211816, China

<sup>2</sup> College of Engineering and Applied Sciences, State Key Laboratory of Analytical Chemistry for Life Science, National Laboratory of Micro-Structures, Nanjing University, Nanjing 210023, China

\* Correspondence: iamafwang@njtech.edu.cn

### Supplementary Figures

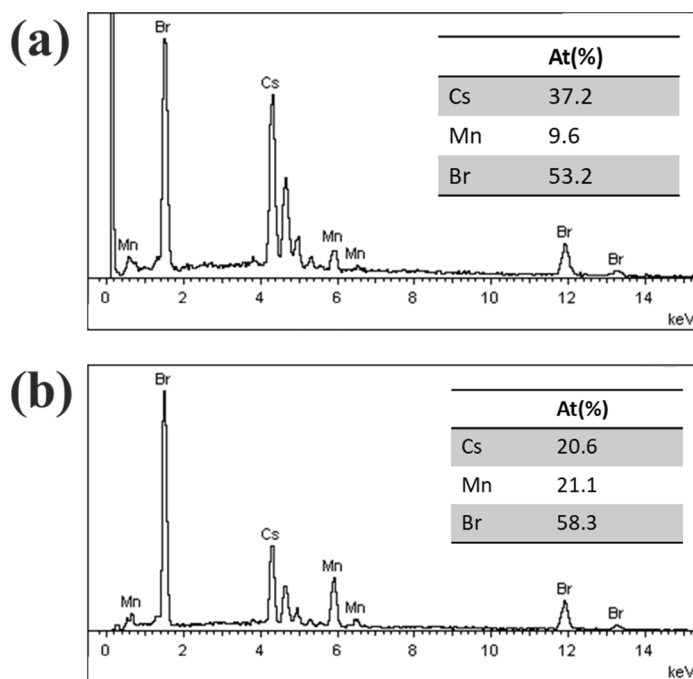

Figure S1. EDS spectrum of the (a)  $\text{Cs}_3\text{MnBr}_5$  and (b)  $\text{CsMnBr}_3$ .
